# Supplementary material
Source: Springer Nature journal article supplement (https://www.springermedizin.de/resource/supplementary/12943_2012_1042_MOESM8_ESM.pdf/9552168)

Number of metastases

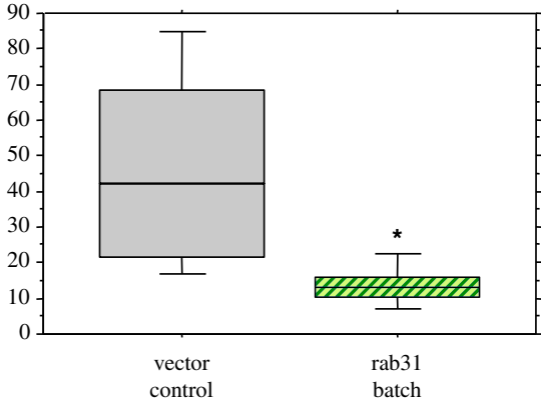

Supplement: MOESM8 [file 9552168]
